# Supplementary material for: Nanoclay based graphene polyaniline hybrid nanocomposites: promising electrode materials for supercapacitors
Source: Royal Society of Chemistry journal article supplement (doi:10.1039/c5ra11064e), 2015-01-01
Supplement: c5ra11064e1.pdf [file c5ra11064e1.pdf]

SUPPORTING INFORMATION for

Nanoclay based graphene polyaniline hybrid nanocomposite: A promising  
electrode material for supercapacitor

R.Oraon<sup>a</sup>, A.De.Adhikari<sup>a</sup>, S.K.Tiwari<sup>a</sup> and G.C.Nayak<sup>a\*</sup>

*<sup>a</sup>Department of Applied Chemistry, ISM Dhanbad, Dhanbad 826004, Jharkhand, India*

SEM images of GAN and GNA in SE and BSE mode.

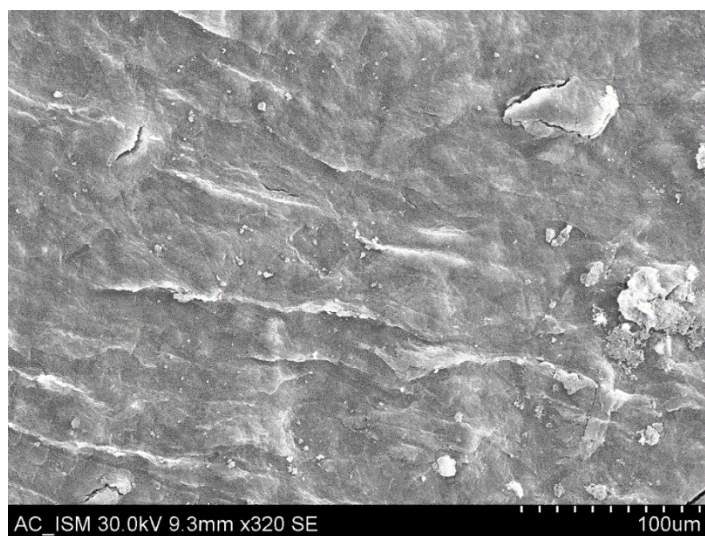

(a)

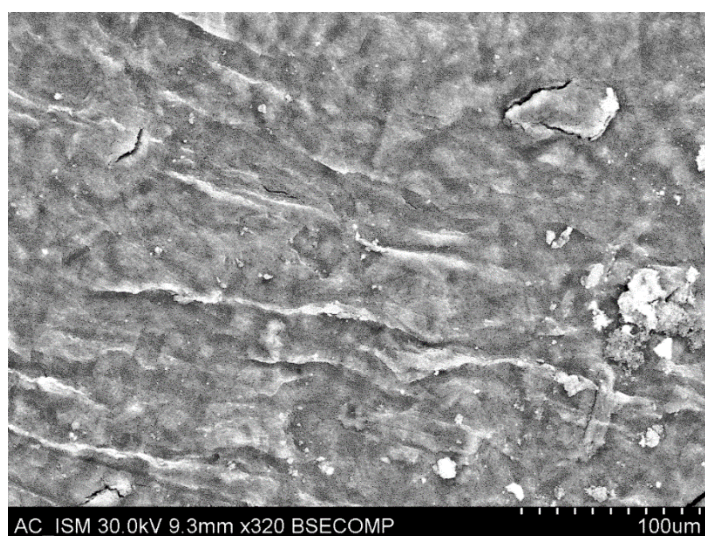

(b)

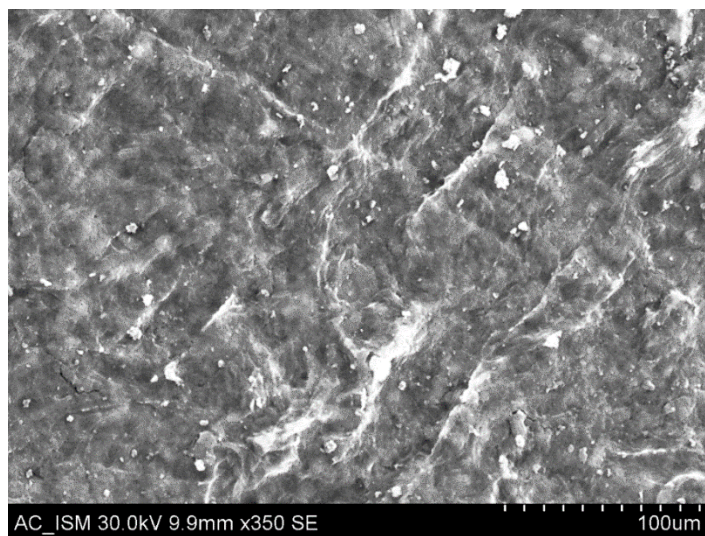

(c)

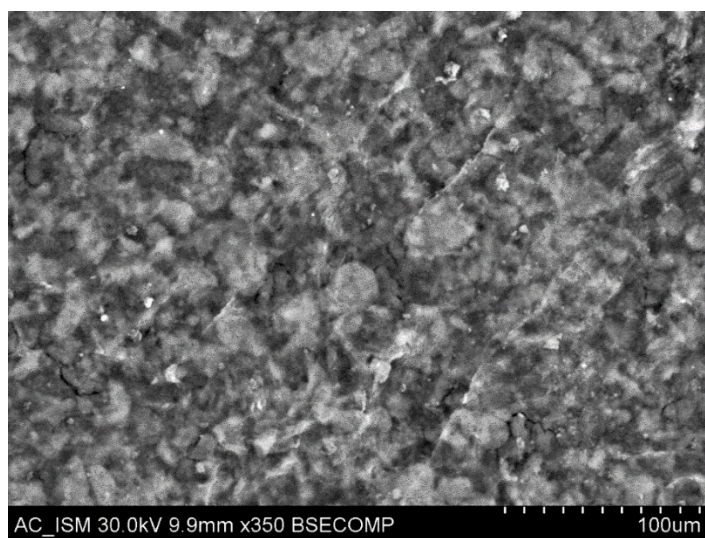

(d)

Figure S1: SEM image of (a) GNA in SE mode, (b) GNA in BSE mode, (c) GAN in SE mode and (d) GAN in BSE mode.

From the SEM images, in SE and BSE mode, it is observed that the change in contrast in the image of both the nanocomposites are uniform all through the samples which is an indication of uniform distribution of nanoclay in the whole sample and its not phase separated from the other components.

## EDX analysis of GAN and GNA

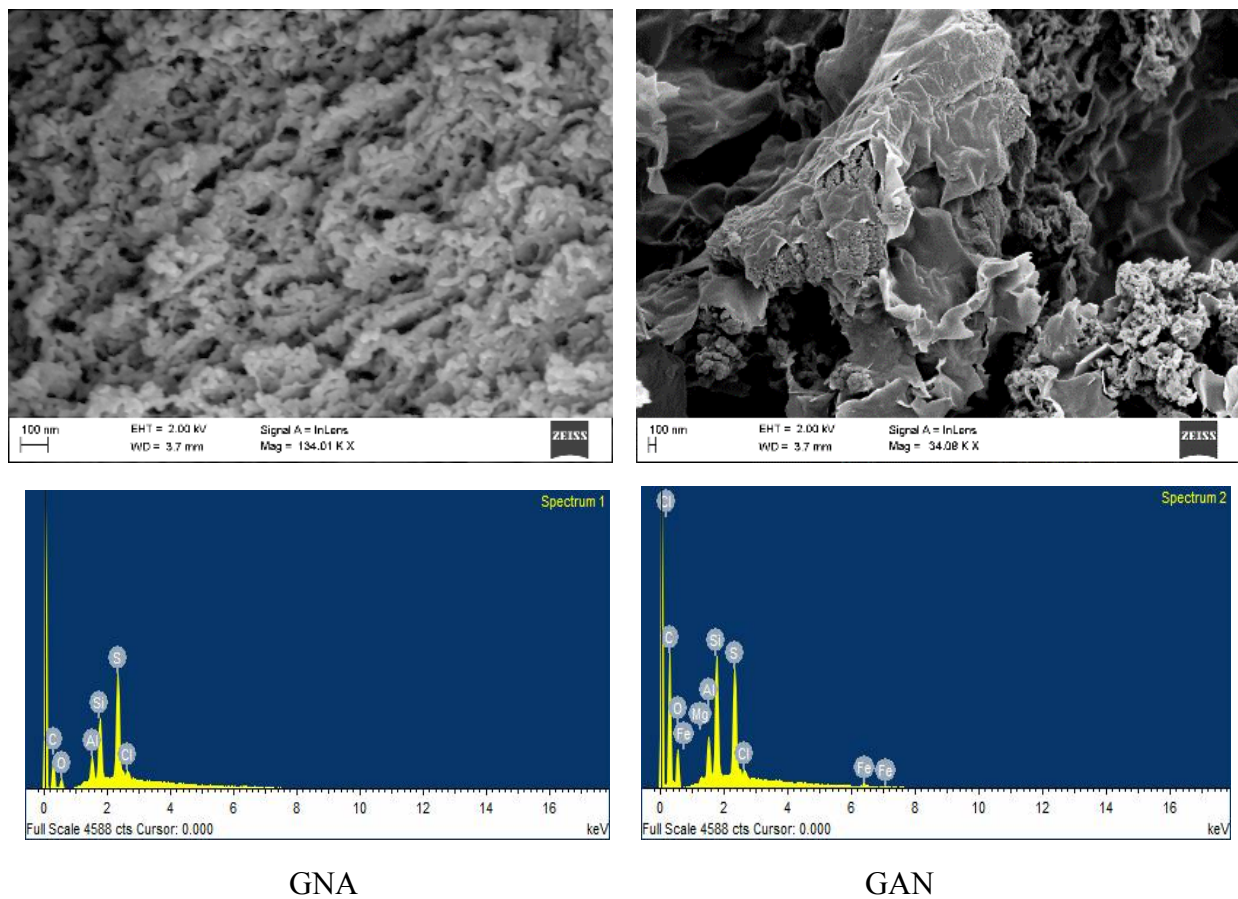

Figure S2: FESEM and EDX (taken over the whole surface) analysis of GNA and GAN which shows the presence of nanoclay based elements in the EDX plot which confirmed the presence of nanoclay in the selected regions.

XRD plot of GAN and GNA at higher  $2\theta$

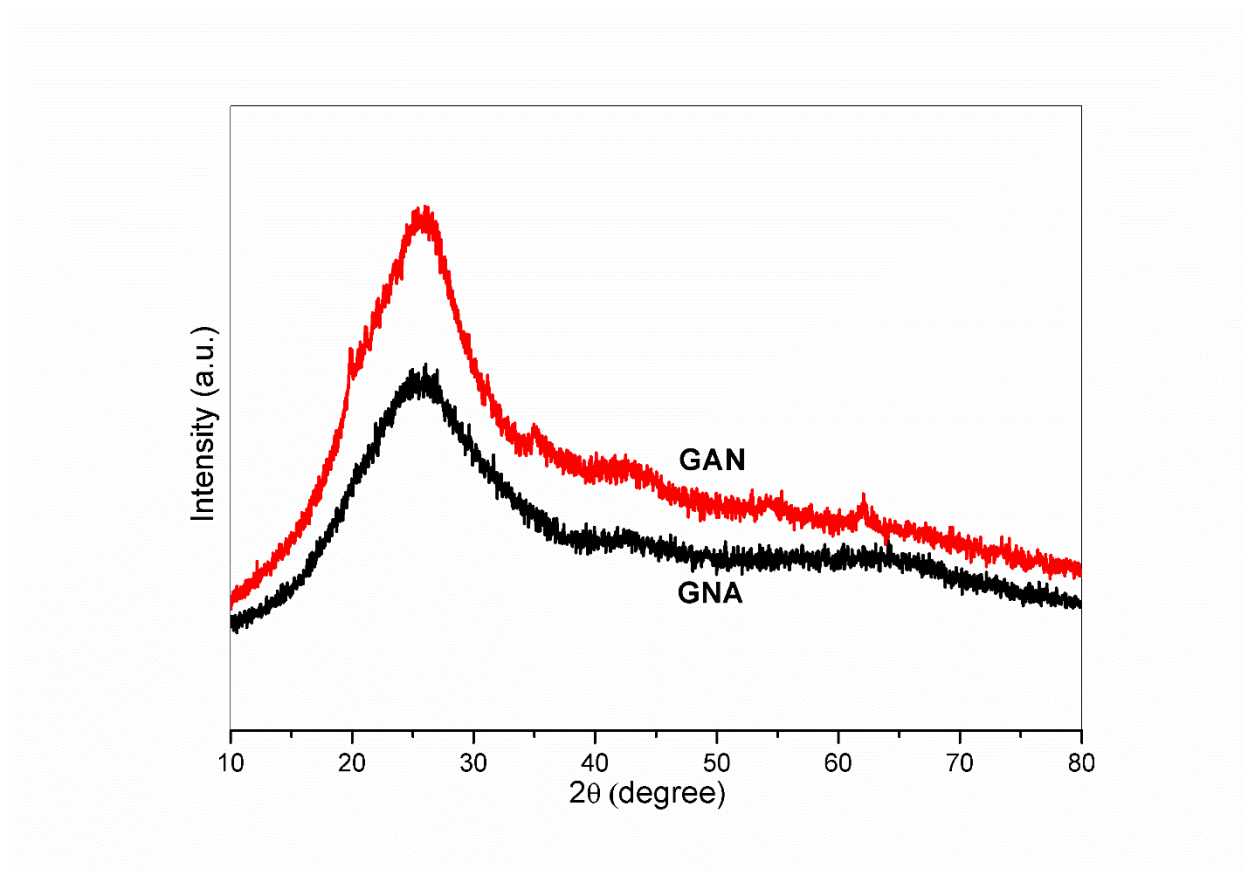

Figure S3: XRD plot of GAN and GNA at higher  $2\theta$

CV plots of GA, GNA and GAN at different scan rates

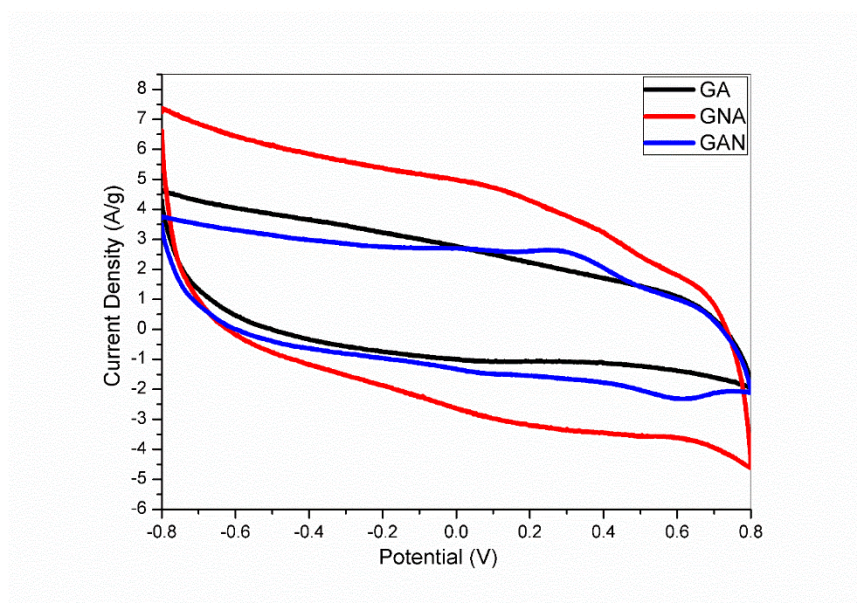

(a)

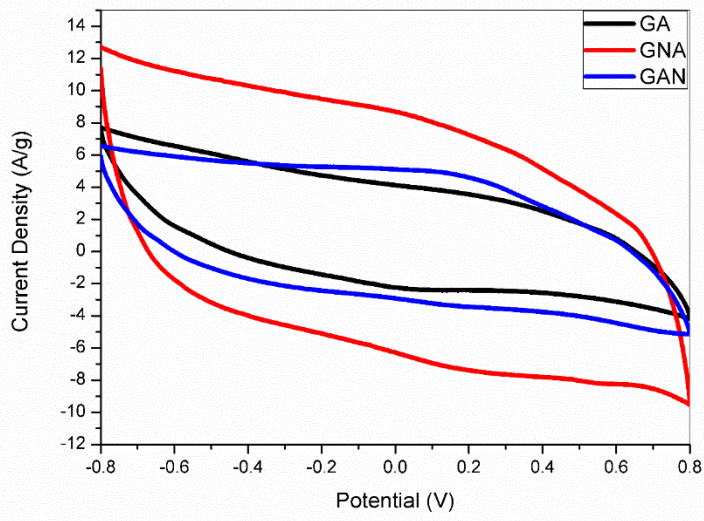

(b)

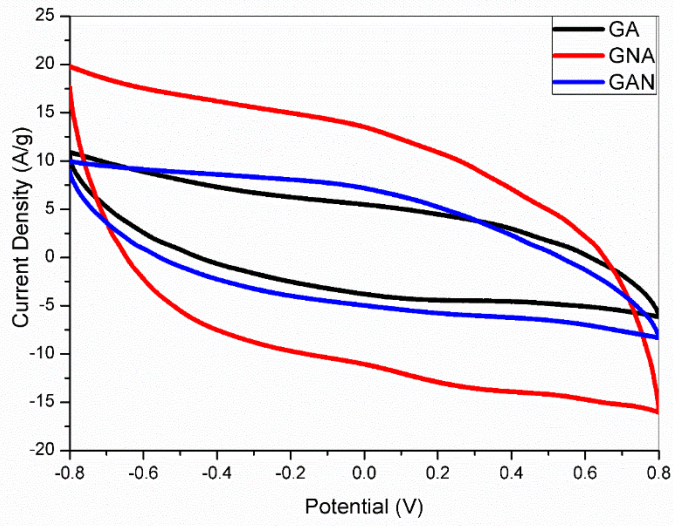

(c)

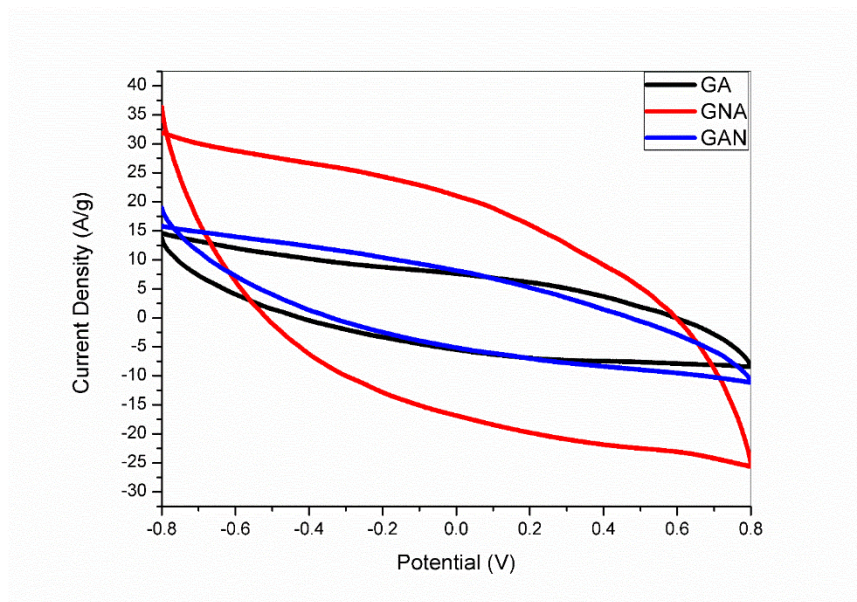

(d)

Figure S4: CV plot of GA, GAN and GNA at scan rates of (a) 20 mV/s, (b) 50 mV/s, (c) 100 mV/s and (d) 200 mV/s

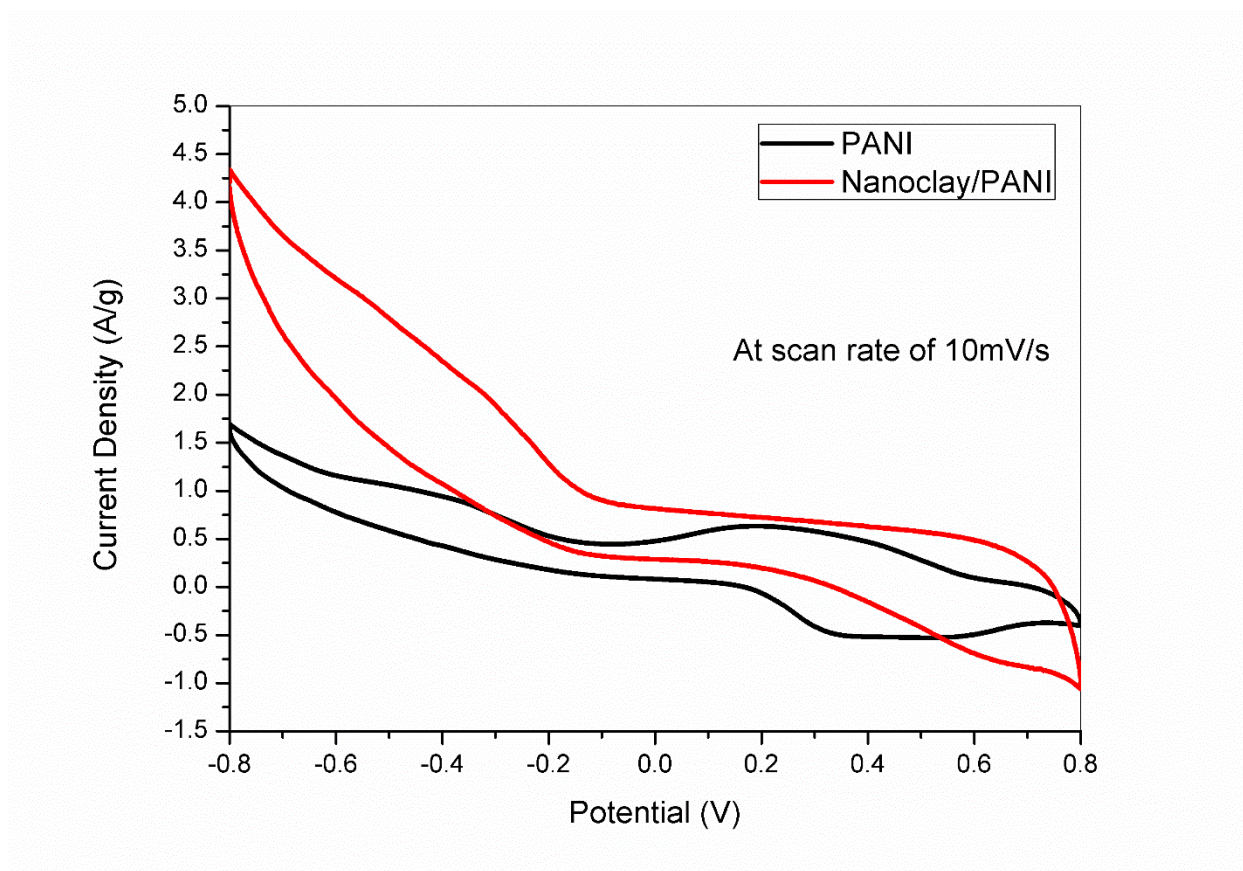

Figure S5: CV plot of PANI and Nanoclay/PANI at scan rate of 10mV/s
